# Supplementary material for: High-resolution probing heparan sulfate–antithrombin interaction on a single endothelial cell surface: single-molecule AFM studies
Source: Royal Society of Chemistry journal article supplement (doi:10.1039/c5cp01305d), 2015-01-01
Supplement: c5cp01305d1.pdf [file c5cp01305d1.pdf]

## Electronic Supplementary Information

### High-resolution probing heparan sulfate-antithrombin interaction on single endothelial cell surface: Single-molecule AFM studies<sup>†</sup>

Cunlan Guo,<sup>a</sup> Xian Fan,<sup>b</sup> Hong Qiu,<sup>b</sup> Wenyuan Xiao,<sup>b</sup> Lianchun Wang,<sup>b</sup> and  
Bingqian Xu<sup>\*a</sup>

<sup>a</sup> Single Molecule Study Laboratory, College of Engineering and Nanoscale Science and Engineering Center, University of Georgia, Athens, GA, USA. Fax: +1-706-542-3804; Tel: +1-706-542-0502

<sup>b</sup> Complex Carbohydrate Research Center and Department of Biochemistry and Molecular Biology, University of Georgia, Athens, GA, USA

\*To whom correspondence should be addressed: email: [bxu@engr.uga.edu](mailto:bxu@engr.uga.edu)

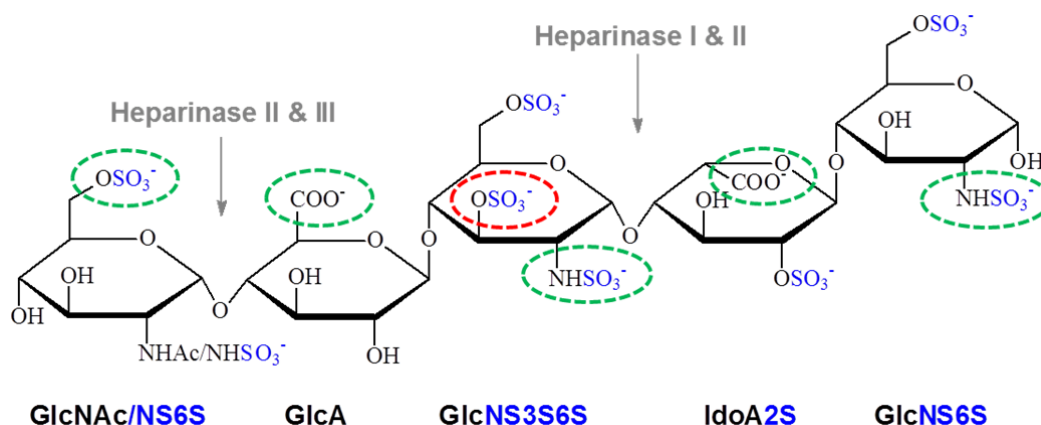

**Figure S1.** Typical structure of a heparin pentasaccharide required for antithrombin binding (Note: all the possible sulfation sites are shown). Dashed circles show the previously identified groups that are critical in heparin's binding to antithrombin.<sup>1</sup> Dashed red circle shows the central 3-*O*-sulfation (3S) modification. The heparinase cleavage sites are also shown.

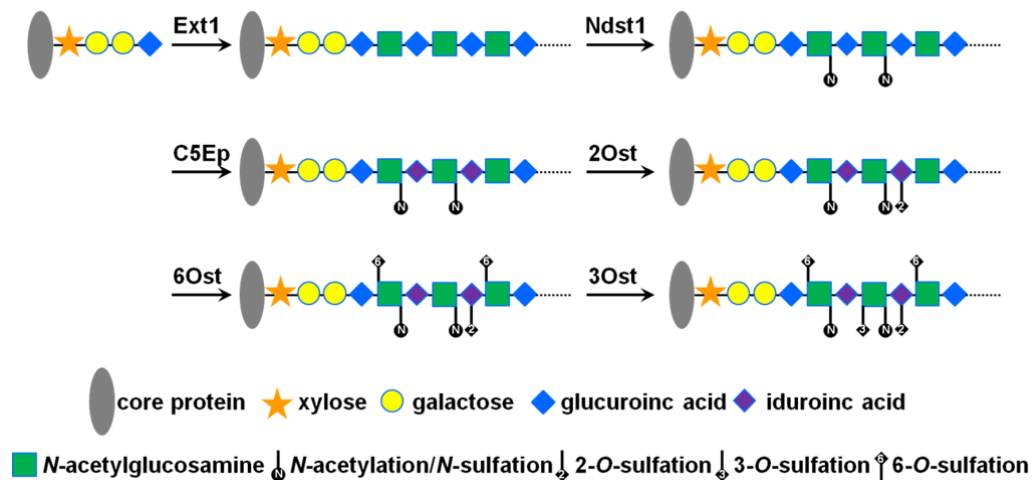

**Figure S2.** Schematic for biosynthesis of HS.<sup>1</sup>

HS is biosynthesized as proteoglycans by alternatively adding uronic acids (iduronic acid, IdoA, or glucuronic acid, GlcA) and *N*-acetylglucosamine (GlcNAc) repeating units to core proteins with co-polymerase exostosin (Ext 1 shown here as an example).<sup>1</sup> The formed HS backbone is sequentially modified by *N*-deacetylation and *N*-sulfation, epimerization and *O*-sulfation with Ndst (such as Ndst1), C5Ep, and Ost (2Ost, 6Ost, 3Ost), respectively. During this process, Ndst catalyzes the *N*-sulfation of GlcNAc units (NS).<sup>2</sup>

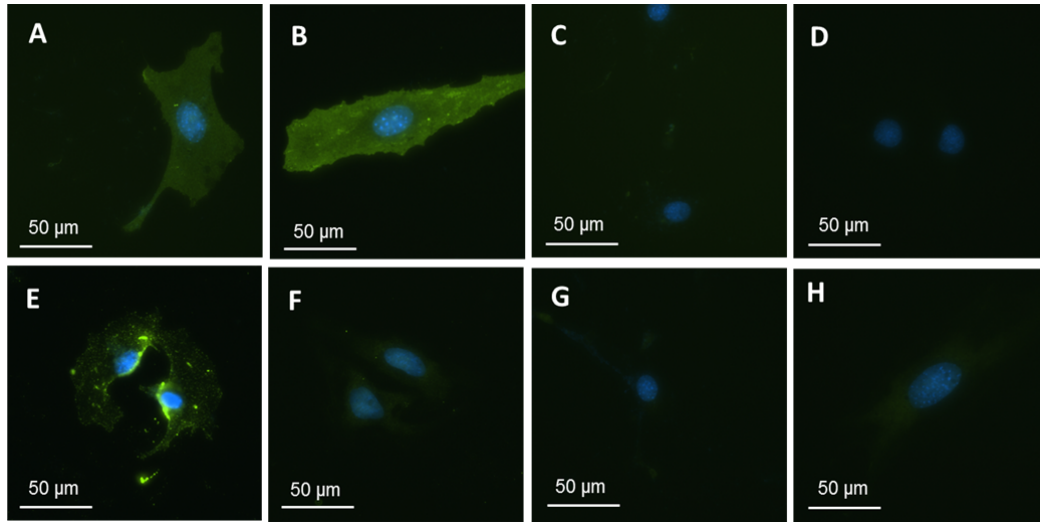

**Figure S3. Immunofluorescence staining of PECAM-1 and HS expression on endothelial cell surface.** The *Ndst1<sup>ff</sup>* and *Ndst1<sup>-/-</sup>* endothelial cells were first stained with the primary anti-PECAM-1 antibody (A, B) or anti-HS antibody 10E4 (E, F), and then stained with corresponding FITC-conjugated secondary antibody (green color). The cells that were not stained with the primary anti-PECAM-1 antibody (C, D) or anti-HS antibody 10E4 (G, H), but only the FITC-conjugated secondary antibody were served as background controls. The cell nuclei were stained by DAPI (blue color).

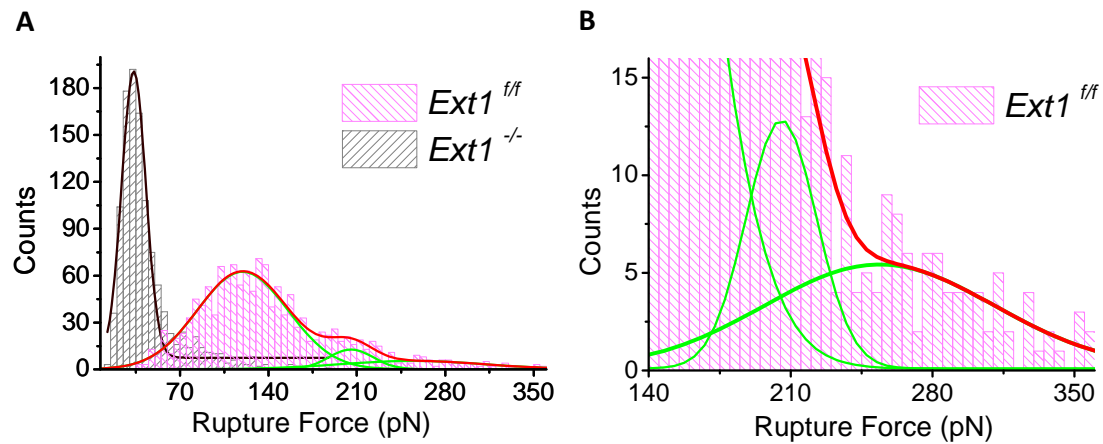

**Figure S4. Comparison of rupture forces between *Ext1*<sup>f/f</sup> and *Ext1*<sup>-/-</sup> cells.** (A) Distributions of rupture force for *Ext1*<sup>f/f</sup> and *Ext1*<sup>-/-</sup> cells. (B) Partially zoom in of histogram for *Ext1*<sup>f/f</sup> cell to clearly show the third peak.

#### References

1. M. Petitou, B. Casu and U. Lindahl, *Biochimie*, 2003, **85**, 83-89.
2. R. Sasisekharan and G. Venkataraman, *Curr. Opin. Chem. Biol.*, 2000, **4**, 626-631.
